# Supplementary material for: Silver(I) coordination architectures with quinoxaline-based N,S-donor ligands: structures and luminescent properties
Source: Royal Society of Chemistry journal article supplement (doi:10.1039/b807485b), 2008-01-01
Supplement: b807485b.pdf [file b807485b.pdf]

## *Supporting Information for*

### **Silver(I) coordination architectures with quinoxaline-based *N,S*-donor ligands: structures and luminescent properties**

Shu-Ming Zhang, Tong-Liang Hu, Jian-Rong Li, Jian-Long Du, and Xian-He Bu\*

X-ray powder diffraction (XRPD) for complexes 1–4

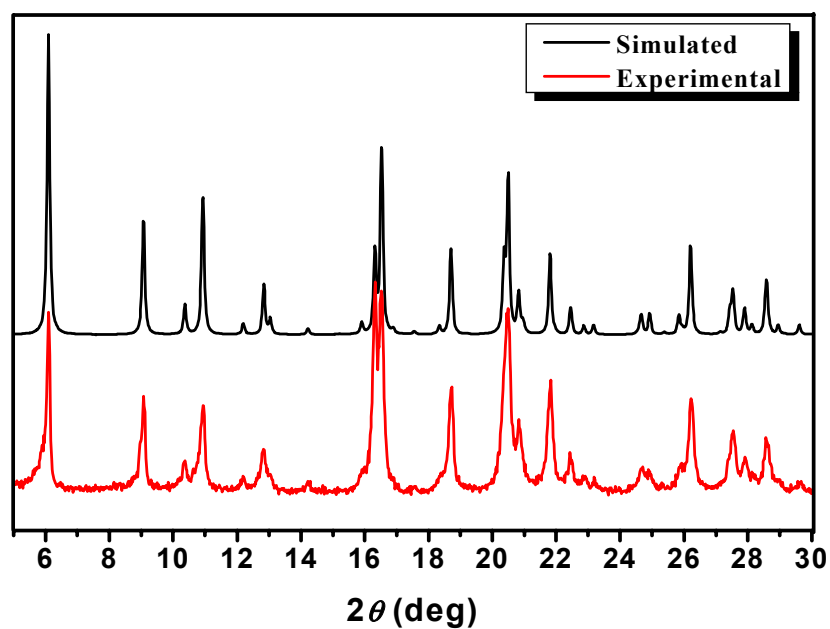

**Fig. S1** XRPD patterns for complex 1

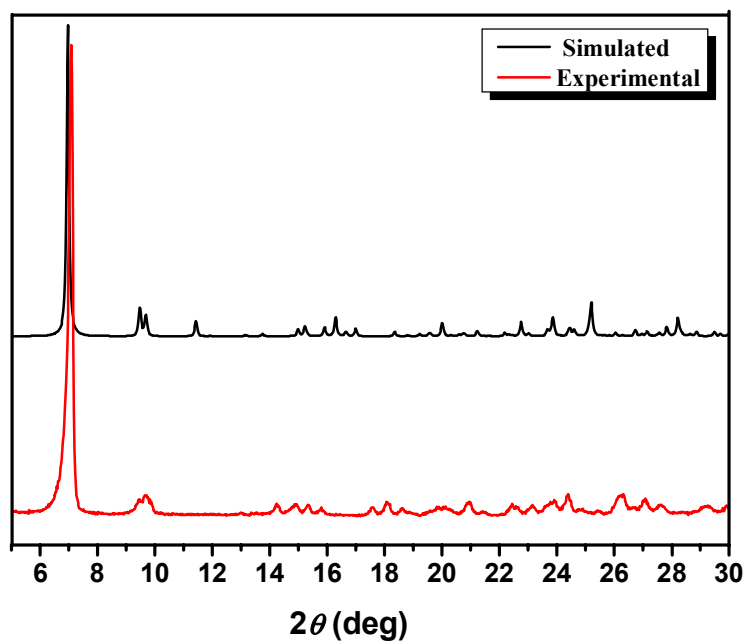

Fig. S2 XRPD patterns for complex 2

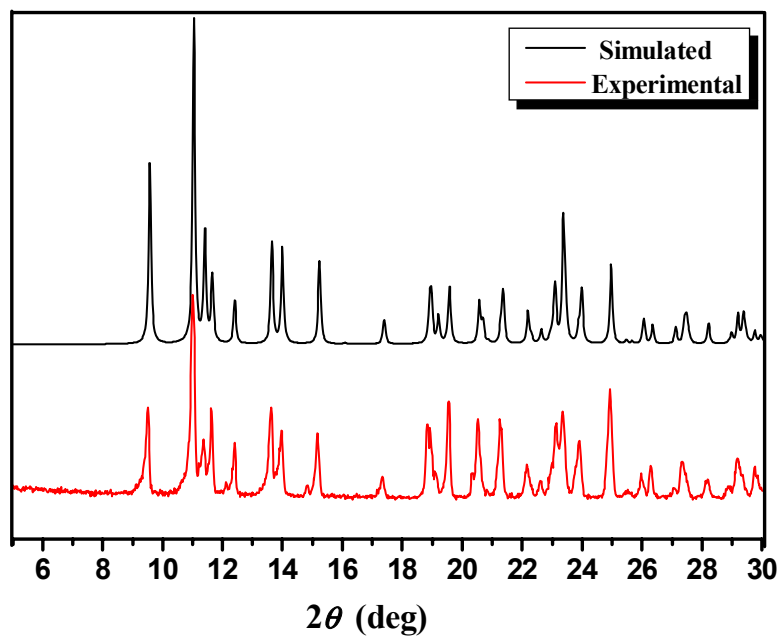

Fig. S3 XRPD patterns for complex 3

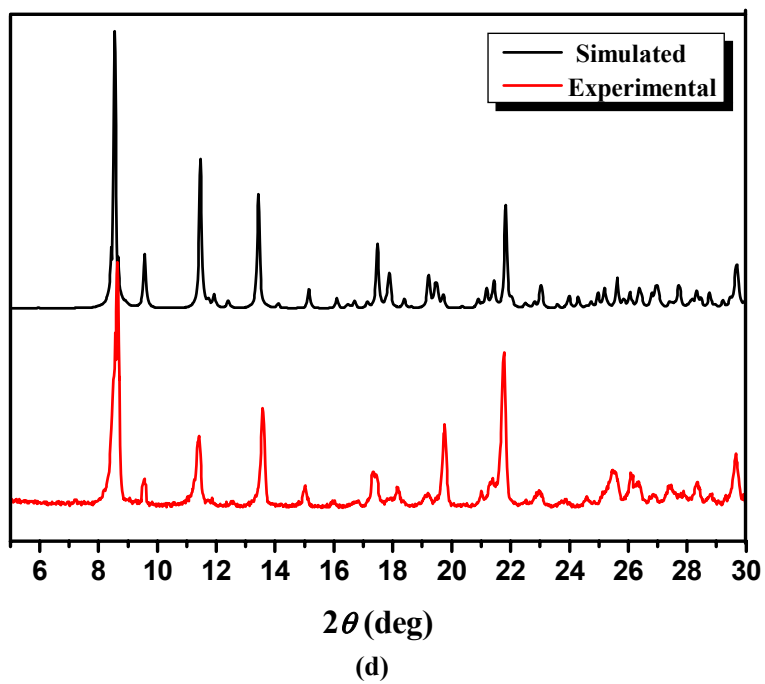

**Fig. S4** XRPD patterns for complex 4
